# Supplementary material for: Autism Spectrum Traits Linked with Reduced Performance on Self-Report Behavioural Measures of Cognitive Flexibility
Source: Springer Nature journal article supplement (doi:10.1007/s10803-018-3503-3), 2018-02-21
Supplement: MOESM2 [file 15482318]

**Table 1**. Separate linear and logistic regressions of lab-based and behavioural measures of cognitive flexibility on Autism Quotient (AQ) and background covariates (including IQ).

| Linear Regression | b (SE) | *p* | 95% CI | Beta |
| --- | --- | --- | --- | --- |
| AQ -> Shifting (BRIEF) | 0.60 (0.13) | <.001** | 0.35, 0.86 | 0.46 |
| AQ -> Number-letter switching Completion Time (TMT) | 0.03 (0.04) | 0.36 | -0.04, 0.11 | 0.12 |
|  |  |  |  |  |
| Logistic Regression | logit (SE) | *p* | 95% CI | OR |
| AQ -> Sequencing Errors (TMT) | -0.06 (0.05) | 0.21 | -0.16, 0.04 | 0.94 |
| AQ -> Set Loss Errors (TMT) | 0.09 (0.04) | 0.03* | 0.01, 0.18 | 1.1 |
| AQ -> Stage 6-7- Errors (ID/ED) | 0.04 (0.04) | 0.38 | -0.04, 0.12 | 1.04 |
| AQ -> Stage 6-7- Trials (ID/ED) | 0.04 (0.04) | 0.38 | -0.04, 0.12 | 1.04 |
| AQ -> Stage 8-9- Errors (ID/ED) | -0.07 (0.05) | 0.13 | -0.16, 0.02 | 0.93 |
| AQ -> Stage 8-9- Trials (ID/ED) | -0.02 (0.05) | 0.70 | -0.12, 0.08 | 0.98 |
| AQ -> Stage 1-9- Errors (ID/ED) | -0.06 (0.05) | 0.20 | -0.16, 0.03 | 0.94 |
| AQ -> Stage 1-9- Trials (ID/ED) | -0.10 (0.05) | 0.06 | -0.20, <.01 | 0.91 |

All regression analyses adjusted for age, gender, years of education; * *p* < .05; ** *p* < .01
